# Supplementary material for: LINC00520 is induced by Src, STAT3, and PI3K and plays a functional role in breast cancer
Source: PubMed Central journal article supplement (PMC5347668; doi:10.18632/oncotarget.11962), 2016-09-10
Supplement: oncotarget-07-81981-s001.pdf [file oncotarget-07-81981-s001.pdf]

# LINC00520 is induced by Src, STAT3, and PI3K and plays a functional role in breast cancer

## Supplementary Material

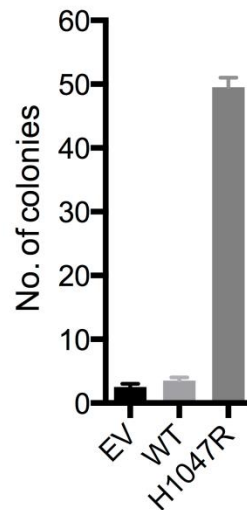

Supplementary Figure 1. Colony growth in soft agar, MCF10A cells stably expressing *PIK3CA* wild-type and mutant *PIK3CA H1047R* were compared relative to empty vector control (EV). Statistical significance was determined using paired Student's t-test, \*  $p < 0.05$ , \*\*  $p < 0.01$ , \*\*\* $p < 0.001$ . For colony formation in soft agar,  $5 \times 10^4$  cells were suspended in MCF10A growth media and 0.4% noble agar. Cell suspension was plated on top a solidified layer of 0.8% noble agar. Cells were fed with growth media every 4 days. After 21 days, colonies were stained with 1mg/ml idonitrotetrazolum chloride and quantified.
